# Supplementary material for: Tumor senescence leads to poor survival and therapeutic resistance in human breast cancer
Source: Front Oncol. 2023 Mar 2;13:1097513. doi: 10.3389/fonc.2023.1097513 (PMC10019818; doi:10.3389/fonc.2023.1097513)
Supplement: Supplementary Table 2 — 278 OS-correlated senescence-high related genes and 37 Sindex genes [file Table_2.xlsx]

## Sheet: res
Supplementary Table2
Gene symbol	beta	HR	lower_95	upper_95	p.value
SHMT2	0.294	1.34	1.21	1.49	3.3e-08
MRPS5	0.321	1.38	1.15	1.65	0.000434
MKI67	0.329	1.39	1.18	1.64	7.88e-05
MASTL	0.226	1.25	1.1	1.43	0.000658
PSME4	0.147	1.16	1.06	1.27	0.00164
FOXP4	0.079	1.08	0.94	1.25	0.273
DNAJC9	0.145	1.16	1.02	1.31	0.0208
FAM83B	0.128	1.14	0.947	1.36	0.17
PTDSS1	0.131	1.14	1.03	1.26	0.0133
ONECUT2	0.197	1.22	1.08	1.37	0.00081
S100A11	0.124	1.13	1.03	1.24	0.00863
CDCA5	0.196	1.22	1.15	1.29	1.33e-10
FAM83D	0.211	1.23	1.15	1.33	3.13e-08
MELK	0.154	1.17	1.1	1.24	1.02e-06
RPP40	0.117	1.12	1.01	1.25	0.0281
B3GALNT2	0.303	1.35	1.14	1.61	0.000654
DLGAP5	0.197	1.22	1.11	1.34	6.69e-05
SLC7A5	0.0794	1.08	1.04	1.13	0.000406
CDCA4	0.248	1.28	1.14	1.44	4.44e-05
HRK	0.152	1.16	1.04	1.3	0.0071
EYA3	0.135	1.15	0.945	1.39	0.166
SLC6A15	-0.0655	0.937	0.765	1.15	0.525
RBM28	0.268	1.31	1.11	1.54	0.00166
ORM2	0.0451	1.05	0.987	1.11	0.13
PSMD2	0.342	1.41	1.24	1.6	2.16e-07
ELK4	0.206	1.23	0.948	1.59	0.119
HYOU1	0.107	1.11	1	1.24	0.0476
GNL2	-0.0117	0.988	0.855	1.14	0.875
SKA2	0.14	1.15	1.01	1.32	0.0413
PSMB2	0.14	1.15	1.02	1.29	0.0189
HES6	0.109	1.12	1.05	1.19	0.000697
UCK2	0.165	1.18	1.07	1.3	0.000914
CKAP5	0.284	1.33	1.16	1.53	6.37e-05
ECE2	0.182	1.2	1.1	1.31	3.65e-05
CCDC86	0.154	1.17	1.04	1.31	0.00994
CSTF3	0.00571	1.01	0.916	1.1	0.904
XRCC3	0.196	1.22	1.03	1.44	0.0244
CNIH2	0.197	1.22	1.1	1.34	8.48e-05
RPP25	0.182	1.2	1.09	1.32	0.000252
MRPS22	-0.0307	0.97	0.82	1.15	0.721
ZNF280C	0.0154	1.02	0.822	1.25	0.887
C5orf34	0.368	1.45	1.21	1.72	3.55e-05
MAGI3	0.432	1.54	1.13	2.09	0.00588
CKS2	0.0364	1.04	0.966	1.11	0.317
LOC100288637	0.499	1.65	1.16	2.35	0.00569
ABTB2	0.188	1.21	1.05	1.38	0.0069
DONSON	0.216	1.24	1.11	1.39	0.000176
FOXM1	0.168	1.18	1.1	1.27	8.78e-06
POLR1C	0.0458	1.05	0.904	1.21	0.542
KIF20A	0.244	1.28	1.19	1.37	4.9e-11
ACOT11	0.00428	1	0.87	1.16	0.953
SRD5A1	0.0746	1.08	0.99	1.17	0.0838
NPM3	-0.0641	0.938	0.853	1.03	0.185
CDK1	0.118	1.12	1.05	1.21	0.000916
GPSM2	0.164	1.18	1.07	1.29	0.000492
SPC25	0.262	1.3	1.13	1.49	0.000193
PSRC1	0.123	1.13	1.01	1.27	0.0331
SF3B3	0.145	1.16	1.04	1.29	0.00968
GTPBP4	0.0607	1.06	0.957	1.18	0.255
WDR77	0.157	1.17	0.952	1.44	0.136
INCENP	0.303	1.35	1.17	1.57	4e-05
POLE2	0.133	1.14	1.02	1.28	0.0209
LAD1	0.0629	1.06	1.02	1.11	0.00296
HR	0.0529	1.05	0.812	1.37	0.691
MCM8	0.346	1.41	1.15	1.73	0.00089
NDRG1	0.153	1.17	1.1	1.24	6.12e-07
BIRC5	0.137	1.15	1.08	1.22	6.24e-06
POLR2H	0.204	1.23	1.06	1.42	0.00655
ATL3	0.207	1.23	1.11	1.36	3.65e-05
RTN4IP1	0.0995	1.1	0.987	1.24	0.0821
RMND5A	0.457	1.58	1.2	2.08	0.00109
EME1	0.36	1.43	1.19	1.72	0.000134
SH3GL3	0.058	1.06	0.885	1.27	0.529
LY6K	0.0103	1.01	0.789	1.29	0.935
SNORD30	0.312	1.37	1.07	1.74	0.0123
ATAD2	0.198	1.22	1.13	1.32	8.72e-07
APEX2	0.246	1.28	1.13	1.45	0.000135
NAPG	0.303	1.35	1.13	1.62	0.000905
KIF4A	0.321	1.38	1.24	1.53	9.28e-10
MVD	0.168	1.18	1.04	1.35	0.0117
MAGOH	-0.133	0.875	0.754	1.02	0.0795
NCAPG	0.192	1.21	1.12	1.31	4.98e-07
NUP205	0.0927	1.1	0.971	1.24	0.137
MCM7	0.0846	1.09	0.987	1.2	0.0912
NUDT5	0.0714	1.07	0.969	1.19	0.174
GPRIN1	0.245	1.28	1.11	1.47	0.000636
KIF2C	0.194	1.21	1.13	1.31	4.36e-07
CDC20	0.147	1.16	1.1	1.22	4.14e-09
ENOX2	0.136	1.15	0.944	1.39	0.169
NUSAP1	0.21	1.23	1.15	1.33	1.4e-08
PTTG1	0.186	1.2	1.13	1.28	4.76e-09
ASNS	0.0555	1.06	0.975	1.15	0.178
CHRNA5	0.128	1.14	0.983	1.31	0.0842
NETO2	0.0895	1.09	1.02	1.17	0.0108
CHD7	0.103	1.11	1.01	1.22	0.031
MTHFD1	0.33	1.39	1.13	1.71	0.00183
ESRRA	0.261	1.3	1.12	1.51	0.000639
CALML5	0.0618	1.06	1.03	1.09	2.39e-05
ZNF670	0.217	1.24	1.08	1.43	0.00199
SKP2	0.119	1.13	1.03	1.24	0.0126
ARL5B	0.0612	1.06	0.938	1.21	0.339
TMSB15A	0.0343	1.03	0.983	1.09	0.194
BTNL2	-0.161	0.851	0.646	1.12	0.252
OTX1	0.112	1.12	0.962	1.3	0.145
EXO1	0.193	1.21	1.13	1.31	3.8e-07
LYNX1	0.0524	1.05	0.895	1.24	0.53
NCAPG2	0.141	1.15	0.995	1.33	0.058
NEIL3	0.291	1.34	1.12	1.6	0.00151
NPB	0.013	1.01	0.897	1.14	0.835
POLR3D	0.0371	1.04	0.772	1.4	0.806
PLP2	0.117	1.12	0.972	1.3	0.116
DHX38	0.143	1.15	0.964	1.38	0.119
BUB1	0.186	1.2	1.11	1.3	4.28e-06
SNRPB	0.228	1.26	1.12	1.41	7.76e-05
PRC1	0.184	1.2	1.13	1.28	3.92e-08
CDCA7	0.0637	1.07	1.01	1.13	0.0215
CHAF1A	0.256	1.29	1.06	1.57	0.0103
RCOR2	0.05	1.05	0.969	1.14	0.229
RACGAP1	0.313	1.37	1.25	1.5	1.46e-11
FANCC	-0.127	0.88	0.654	1.19	0.402
TTF2	0.18	1.2	1.06	1.35	0.00304
MTIF2	0.109	1.12	0.953	1.31	0.173
CDC45	0.175	1.19	1.12	1.27	1.74e-07
ZC3H18	0.213	1.24	0.993	1.54	0.0577
SLC25A13	0.0553	1.06	0.945	1.18	0.333
IFRD1	-0.124	0.883	0.783	0.997	0.0445
CEP152	0.163	1.18	0.972	1.43	0.0956
RPF2	0.037	1.04	0.93	1.16	0.509
MPHOSPH10	0.244	1.28	1.09	1.5	0.00269
FADS1	0.0813	1.08	1	1.18	0.0505
PRR11	0.213	1.24	1.11	1.38	0.000177
KIF24	0.216	1.24	1.05	1.46	0.00939
KLRG2	0.131	1.14	1	1.29	0.0419
BLM	0.159	1.17	1.04	1.32	0.00702
KIF18A	0.263	1.3	1.1	1.54	0.00186
USP6NL	0.189	1.21	1.04	1.4	0.0132
CDC25A	0.198	1.22	1.08	1.37	0.00108
UBE2T	0.127	1.14	1.06	1.22	0.000528
DIP2A	0.3	1.35	1.17	1.56	6.07e-05
MAD2L2	-0.0358	0.965	0.855	1.09	0.561
GGH	0.00595	1.01	0.954	1.06	0.824
PKMYT1	0.352	1.42	1.29	1.57	9.37e-13
HPS1	0.247	1.28	1.11	1.47	0.000616
CENPA	0.152	1.16	1.08	1.25	8.02e-05
ASF1B	0.176	1.19	1.09	1.3	0.000123
SNORA65	0.186	1.2	0.975	1.49	0.0839
SMC1B	-0.0545	0.947	0.723	1.24	0.692
CCNA2	0.184	1.2	1.11	1.3	1.05e-05
NCAPD2	0.141	1.15	1.04	1.27	0.0056
FANCD2	0.272	1.31	1.18	1.46	4.81e-07
COG4	0.159	1.17	1.01	1.37	0.0428
SNORD15B	0.172	1.19	1	1.41	0.0488
COQ3	0.214	1.24	1.08	1.42	0.00199
PSMB1	0.306	1.36	1.15	1.61	0.000397
LYPD1	0.237	1.27	1.01	1.59	0.0378
KIF14	0.234	1.26	1.13	1.41	3.21e-05
BRCA1	0.147	1.16	0.993	1.35	0.0616
KPNA4	0.169	1.18	1.03	1.36	0.0157
RBL1	0.355	1.43	1.13	1.8	0.00291
TAF5	-0.0138	0.986	0.79	1.23	0.903
IQGAP3	0.444	1.56	1.19	2.05	0.00148
GET4	0.267	1.31	1.17	1.46	2.8e-06
SNRPG	0.0458	1.05	0.912	1.2	0.516
PGAM5	0.234	1.26	1.12	1.43	0.000202
TBC1D7	0.133	1.14	1.02	1.28	0.0237
CDCA2	0.0522	1.05	0.943	1.18	0.355
TFRC	0.0871	1.09	1.01	1.17	0.0211
GFOD2	0.191	1.21	1.05	1.39	0.00755
MXD3	0.328	1.39	1.22	1.57	2.8e-07
ESPL1	0.445	1.56	1.32	1.84	1.45e-07
CBR1	-0.00771	0.992	0.816	1.21	0.939
GINS3	0.206	1.23	1.07	1.42	0.00418
GINS4	0.183	1.2	1.02	1.41	0.0256
PDSS1	0.137	1.15	1.03	1.28	0.0153
IMPDH1	0.157	1.17	1.05	1.3	0.00355
RRP36	0.238	1.27	1.09	1.47	0.0017
NUTF2	0.263	1.3	1.13	1.49	0.000156
RBM38	0.0414	1.04	0.94	1.16	0.43
APOBEC3A	0.12	1.13	1.04	1.22	0.00239
BMP7	0.07	1.07	0.977	1.18	0.139
SOX11	0.1	1.11	1.06	1.16	2.28e-05
RTN4R	0.117	1.12	0.952	1.33	0.167
HJURP	0.212	1.24	1.14	1.34	4.74e-07
GPR180	0.183	1.2	1.06	1.36	0.00316
KATNB1	0.125	1.13	0.978	1.31	0.0967
DDIT4	0.142	1.15	1.08	1.23	1.08e-05
RAD54B	0.165	1.18	1.03	1.35	0.0182
DNAJB11	0.194	1.21	1.08	1.37	0.00145
PLK4	0.253	1.29	1.16	1.43	2.25e-06
KNTC1	0.162	1.18	1.06	1.3	0.00142
MMP1	-0.00731	0.993	0.904	1.09	0.878
TMEM105	0.172	1.19	1	1.4	0.0442
FEN1	0.251	1.29	1.18	1.4	7.95e-09
COX4I1	0.113	1.12	0.958	1.31	0.157
MAP7D2	-0.0815	0.922	0.77	1.1	0.374
GPC2	0.038	1.04	0.891	1.21	0.628
IL20RB	0.0859	1.09	0.955	1.24	0.203
RPIA	-0.0364	0.964	0.823	1.13	0.653
GPR63	0.165	1.18	0.862	1.61	0.302
PBK	0.12	1.13	1.03	1.23	0.0093
LMNB1	0.443	1.56	1.3	1.87	1.52e-06
YRDC	0.124	1.13	0.975	1.31	0.103
FAM72A	0.1	1.11	0.982	1.24	0.0978
PDE7A	-0.00339	0.997	0.851	1.17	0.966
CDC25C	0.268	1.31	1.15	1.48	2.34e-05
VPS4A	0.0888	1.09	0.944	1.27	0.235
HEATR1	-0.0205	0.98	0.869	1.1	0.737
TMPRSS13	-0.0302	0.97	0.859	1.1	0.627
RRP9	0.238	1.27	1	1.61	0.0484
STMN1	0.09	1.09	1.01	1.19	0.0323
WDR62	0.229	1.26	1.06	1.49	0.00921
ZWINT	0.25	1.28	1.18	1.4	9.51e-09
E2F8	0.432	1.54	1.12	2.12	0.008
WIPF3	-0.216	0.806	0.675	0.963	0.0173
VASH2	-0.0221	0.978	0.901	1.06	0.595
POP1	0.295	1.34	1.16	1.55	7.72e-05
NUDT3	0.162	1.18	1.02	1.35	0.0237
CCDC77	0.0248	1.03	0.913	1.15	0.675
MUC15	0.0945	1.1	0.944	1.28	0.223
DBNDD1	0.061	1.06	0.991	1.14	0.0867
MND1	0.17	1.18	1.06	1.32	0.00241
FOXD1	0.101	1.11	1.01	1.21	0.0301
ATP6V1F	-0.0438	0.957	0.809	1.13	0.609
TCF19	0.318	1.37	1.05	1.8	0.0222
EIF4EBP1	0.22	1.25	1.12	1.38	3.22e-05
DSCC1	0.223	1.25	1.06	1.47	0.00679
CENPN	0.122	1.13	1.05	1.21	0.00103
FAM136A	0.111	1.12	0.963	1.3	0.144
RASAL1	0.225	1.25	1.08	1.46	0.00387
PUS7	0.00746	1.01	0.889	1.14	0.907
CCNE1	0.1	1.11	1.03	1.18	0.00315
NUP107	0.207	1.23	1.08	1.4	0.00169
TOP2A	0.146	1.16	1.1	1.22	1.79e-07
TNNT2	-0.0647	0.937	0.78	1.13	0.49
FBXO5	0.197	1.22	1.1	1.34	8.13e-05
SLURP1	0.11	1.12	1.03	1.21	0.00897
HBQ1	0.0203	1.02	0.862	1.21	0.814
IRAK1	0.0077	1.01	0.905	1.12	0.888
TEAD4	0.0708	1.07	0.96	1.2	0.213
TUBB3	0.0108	1.01	0.964	1.06	0.656
ZFP64	0.421	1.52	1.16	2.01	0.00261
POLQ	0.248	1.28	1.17	1.4	7.97e-08
CENPL	0.376	1.46	1.28	1.66	2.81e-08
YBX2	0.0935	1.1	1.01	1.19	0.0198
KIF23	0.242	1.27	1.15	1.41	2e-06
COCH	-0.0811	0.922	0.849	1	0.0531
RAD51AP1	0.116	1.12	1.04	1.21	0.00399
RIPK2	0.0798	1.08	0.987	1.19	0.0921
TIMELESS	0.327	1.39	1.25	1.54	2.6e-09
EZH2	0.114	1.12	1.01	1.24	0.0309
SPAG5	0.287	1.33	1.14	1.56	0.00027
DLL3	0.106	1.11	1.01	1.22	0.0281
PCSK1N	0.096	1.1	1.03	1.18	0.00532
FANCG	0.0539	1.06	0.923	1.21	0.43
RNASEH2A	0.254	1.29	1.16	1.44	4.83e-06
EBP	0.206	1.23	1.1	1.37	0.000302
KLHDC3	-0.106	0.899	0.778	1.04	0.153
RECQL4	0.219	1.24	1.13	1.37	4.48e-06
ST14	0.0925	1.1	0.994	1.21	0.0668
UBE2C	0.153	1.17	1.11	1.22	8.91e-10
NSDHL	0.222	1.25	1.09	1.42	0.000961
PRAME	0.123	1.13	1.07	1.19	1.18e-05
ALG2	0.28	1.32	0.98	1.78	0.0671
LSM2	0.00817	1.01	0.867	1.17	0.916
EIF4E2	0.145	1.16	0.996	1.34	0.0557
E2F7	0.31	1.36	1.2	1.55	1.67e-06
CENPO	0.503	1.65	1.39	1.97	2.57e-08
SLCO4A1	0.0458	1.05	0.857	1.28	0.654
CDK2	0.257	1.29	1.13	1.48	0.000251
SLC2A1	0.0605	1.06	0.989	1.14	0.0966
PDCD2L	0.0952	1.1	0.961	1.26	0.165
UBE2S	0.205	1.23	1.14	1.32	8e-09
CHAF1B	0.134	1.14	1.03	1.27	0.0102
KTI12	0.0565	1.06	0.867	1.29	0.578
UPF3B	-0.000166	1	0.857	1.17	0.998
TK1	0.21	1.23	1.15	1.32	7.39e-10
CCNE2	0.239	1.27	1.17	1.37	3.22e-09
TROAP	0.273	1.31	1.21	1.42	1.45e-11
CENPF	0.189	1.21	1.12	1.3	2.92e-07
LRP8	0.129	1.14	1.05	1.23	0.00185
NDUFA9	0.0774	1.08	0.945	1.24	0.259
TMEM52	0.192	1.21	0.996	1.47	0.0551
ARPC5L	0.223	1.25	1.09	1.43	0.00103
OR7E91P	0.0587	1.06	0.907	1.24	0.462
ORC6	0.277	1.32	1.18	1.47	5.91e-07
CDCA8	0.192	1.21	1.12	1.31	3.72e-06
MRPS9	0.225	1.25	1.06	1.48	0.00865
EMG1	-0.123	0.884	0.772	1.01	0.0769
UNG	0.0908	1.1	0.992	1.21	0.0713
PSAT1	0.0204	1.02	0.971	1.07	0.423
SLC35A2	0.2	1.22	1.1	1.36	0.000274
BYSL	0.207	1.23	1.09	1.39	0.00103
IDH2	0.143	1.15	1.08	1.24	6.34e-05
RCAN3	0.181	1.2	0.98	1.46	0.0773
WDR4	0.258	1.29	1.02	1.65	0.0358
LRRC8B	0.0741	1.08	0.954	1.22	0.23
RFC5	0.2	1.22	1.07	1.4	0.00373
VAC14	0.154	1.17	1.02	1.33	0.0249
POLA2	0.245	1.28	1.12	1.45	0.00017
SLC5A6	-0.00291	0.997	0.933	1.07	0.932
LIG1	0.219	1.24	1.09	1.42	0.000988
ERCC6L	0.508	1.66	1.36	2.03	8.42e-07
BARD1	0.157	1.17	1.06	1.3	0.00256
SNRPA1	0.0884	1.09	0.967	1.23	0.154
REEP4	0.239	1.27	1.05	1.54	0.016
KIFC1	0.177	1.19	1.11	1.29	5.14e-06
PLK1	0.426	1.53	1.32	1.78	2.68e-08
PPIH	-0.0151	0.985	0.851	1.14	0.84
GABRE	0.0898	1.09	0.963	1.24	0.166
GPR3	0.239	1.27	0.96	1.68	0.0937
CSE1L	0.146	1.16	1.03	1.29	0.0105
TXNL4B	0.278	1.32	1.01	1.72	0.041
CDKN3	0.169	1.18	1.1	1.28	1.67e-05
PPP1R14B	0.202	1.22	1.1	1.36	0.000113
GPT2	0.0635	1.07	1	1.14	0.0484
NUP93	0.242	1.27	1.13	1.43	4.2e-05
CAMKV	0.129	1.14	0.953	1.36	0.154
PATL1	0.155	1.17	1.02	1.34	0.0301
NRTN	-0.0303	0.97	0.804	1.17	0.752
MON1B	0.275	1.32	1.11	1.56	0.00161
RFWD3	0.177	1.19	1.06	1.34	0.00279
E2F2	0.137	1.15	1.07	1.23	7.13e-05
CCNB2	0.151	1.16	1.09	1.24	1.02e-06
KIF15	0.243	1.27	1.15	1.41	3.31e-06
ABCF2	0.158	1.17	1.01	1.36	0.0338
AURKA	0.202	1.22	1.14	1.31	3.46e-09
ZBED4	0.268	1.31	1.14	1.5	0.00014
CTU2	0.263	1.3	1.04	1.63	0.0236
LHX2	0.178	1.2	1.08	1.32	0.000381
MMS22L	0.0686	1.07	0.837	1.37	0.586
PHF19	0.23	1.26	1.1	1.43	0.000543
NRM	0.238	1.27	1.11	1.46	0.000684
CHODL	0.0874	1.09	0.925	1.29	0.301
MCM6	0.13	1.14	1.03	1.26	0.00977
CENPK	0.272	1.31	1.16	1.48	1.42e-05
BAIAP2L1	0.144	1.16	1.07	1.25	0.00043
SEC61A2	0.356	1.43	1.24	1.64	4.24e-07
TRIP13	0.163	1.18	1.1	1.26	1.94e-06
SEPHS1	-0.15	0.861	0.75	0.988	0.0335
FANCE	0.114	1.12	0.994	1.26	0.0629
AKR1E2	-0.0599	0.942	0.726	1.22	0.652
CPSF3	-0.0287	0.972	0.828	1.14	0.726
GMPS	0.219	1.24	1.13	1.38	1.79e-05
RDM1	0.138	1.15	0.975	1.35	0.0978
TMEM208	0.174	1.19	1.05	1.35	0.00637
RIPK4	0.284	1.33	1.14	1.54	0.000202
TTK	0.159	1.17	1.09	1.26	1.06e-05
SNORD100	0.186	1.2	0.983	1.47	0.0733
BEND3	0.278	1.32	1.14	1.53	0.000246
CHMP1A	0.116	1.12	1	1.26	0.0419
SUMO3	0.254	1.29	1.12	1.48	0.000383
NCBP2	0.34	1.41	1.22	1.61	1.36e-06
TYMS	0.117	1.12	1.05	1.2	0.000542
PLCH1	0.106	1.11	0.985	1.26	0.0871
MCM4	0.203	1.22	1.14	1.32	1.34e-07
GINS2	0.0897	1.09	1.03	1.16	0.00486
MTBP	0.341	1.41	1.19	1.66	5.18e-05
C6orf52	-0.0731	0.93	0.841	1.03	0.152
CA9	0.145	1.16	1.08	1.24	8.37e-05
ZNF93	0.157	1.17	0.961	1.43	0.118
NUP155	0.219	1.24	1.1	1.41	0.000665
HSD17B10	0.198	1.22	1.04	1.42	0.0132
CENPM	0.217	1.24	1.12	1.38	3.19e-05
CENPE	0.261	1.3	1.18	1.43	7.44e-08
ASPM	0.146	1.16	1.08	1.24	1.59e-05
GPR19	0.12	1.13	0.994	1.28	0.0618
PPP3R1	0.0986	1.1	0.968	1.26	0.141
STIL	0.192	1.21	1.11	1.32	1.36e-05
CENPI	0.566	1.76	1.36	2.28	1.77e-05
CSTF2	0.113	1.12	0.961	1.3	0.148
ATAD5	0.417	1.52	1.21	1.9	0.000292
TPX2	0.237	1.27	1.18	1.36	2.89e-10
MCM3	0.184	1.2	1.07	1.35	0.00147
DTNA	-0.0199	0.98	0.911	1.06	0.596
CDCA3	0.149	1.16	1.08	1.25	8.02e-05
CKAP2L	0.269	1.31	1.19	1.43	6.2e-09
BCL2L12	0.119	1.13	1.01	1.25	0.0292
TFAP2C	-0.00619	0.994	0.927	1.07	0.863
POLR3G	-0.0877	0.916	0.647	1.3	0.621
PDHA1	0.145	1.16	1.02	1.31	0.027
ANLN	0.175	1.19	1.08	1.31	0.000326
FTSJ1	0.312	1.37	1.09	1.71	0.00676
TUBA1B	0.392	1.48	1.29	1.7	3.83e-08
SNORA33	0.136	1.15	0.996	1.32	0.0576
KIF1A	0.0314	1.03	0.985	1.08	0.187
CBX2	0.113	1.12	1.07	1.17	1.15e-06
MPHOSPH9	0.199	1.22	0.959	1.55	0.105
HIVEP2	-0.0919	0.912	0.723	1.15	0.438
PANK1	0.0754	1.08	0.988	1.18	0.0895
CHCHD3	-0.0324	0.968	0.86	1.09	0.592
XK	0.0708	1.07	0.895	1.29	0.444
STOML2	0.0878	1.09	0.948	1.26	0.222
PIGA	0.0524	1.05	0.907	1.22	0.494
RPUSD3	0.195	1.22	1.06	1.39	0.00428
ORC1	0.412	1.51	1.22	1.88	0.000195
POC1A	0.298	1.35	1.22	1.49	6.21e-09
COQ9	0.219	1.24	1.08	1.43	0.00182
AURKB	0.179	1.2	1.12	1.28	4.66e-07
MCM2	0.214	1.24	1.14	1.35	5.77e-07
CCDC18	0.182	1.2	0.964	1.49	0.103
DHDH	0.14	1.15	1.03	1.28	0.00973
PREP	0.136	1.15	1.01	1.3	0.0338
DKC1	0.0992	1.1	0.979	1.25	0.108
OIP5	0.196	1.22	1.12	1.33	1.05e-05
SRPK1	0.111	1.12	0.991	1.26	0.0701
NMU	0.1	1.11	1.02	1.2	0.0139
CDKN2D	0.133	1.14	1.01	1.29	0.0337
NKX2.5	0.223	1.25	1.03	1.52	0.0254
CBX5	0.207	1.23	1.06	1.43	0.00695
SAE1	0.215	1.24	1.04	1.47	0.015
CHEK1	0.139	1.15	1.04	1.26	0.00448
GPR37	-0.0331	0.967	0.88	1.06	0.494
GDAP2	0.0582	1.06	0.836	1.34	0.63
EIF5B	-0.031	0.969	0.785	1.2	0.773
DDX19A	0.359	1.43	1.19	1.72	0.000105
CDK4	0.00746	1.01	0.87	1.17	0.921
HMGA1	0.137	1.15	1.06	1.24	0.000385
CEP55	0.165	1.18	1.09	1.27	2.85e-05
NKRF	0.165	1.18	0.993	1.4	0.0605
LMNB2	0.142	1.15	1.04	1.28	0.00651
MCM10	0.157	1.17	1.09	1.26	2.06e-05
GLMN	-0.18	0.835	0.721	0.968	0.0167
UMODL1	0.325	1.38	1.19	1.62	3.92e-05

## Sheet: index genes
37 Sindex genes
SHMT2
ONECUT2
RPP25
KIF20A
NDRG1
NAPG
CALML5
RACGAP1
IFRD1
MPHOSPH10
BLM
PKMYT1
COQ3
PSMB1
LYPD1
TBC1D7
GFOD2
MXD3
SOX11
GPR180
DDIT4
STMN1
WIPF3
CENPL
EZH2
PCSK1N
PRAME
TROAP
ZBED4
CENPK
SEC61A2
SEPHS1
RIPK4
SUMO3
TUBA1B
GLMN
UMODL1
